# Supplementary figures and images for: Codevelopment of COVID-19 infection prevention and control guidelines in lower-middle-income countries: the ‘SPRINT’ principles
Source: PubMed Central journal article supplement — BMJ Glob Health. 2021 Aug 27;6(8):e006406. doi: 10.1136/bmjgh-2021-006406 (PMC8406459; doi:10.1136/bmjgh-2021-006406), 2021-08-27

Supplementary file 1: COVID-19 IPC guidelines development team schematic.

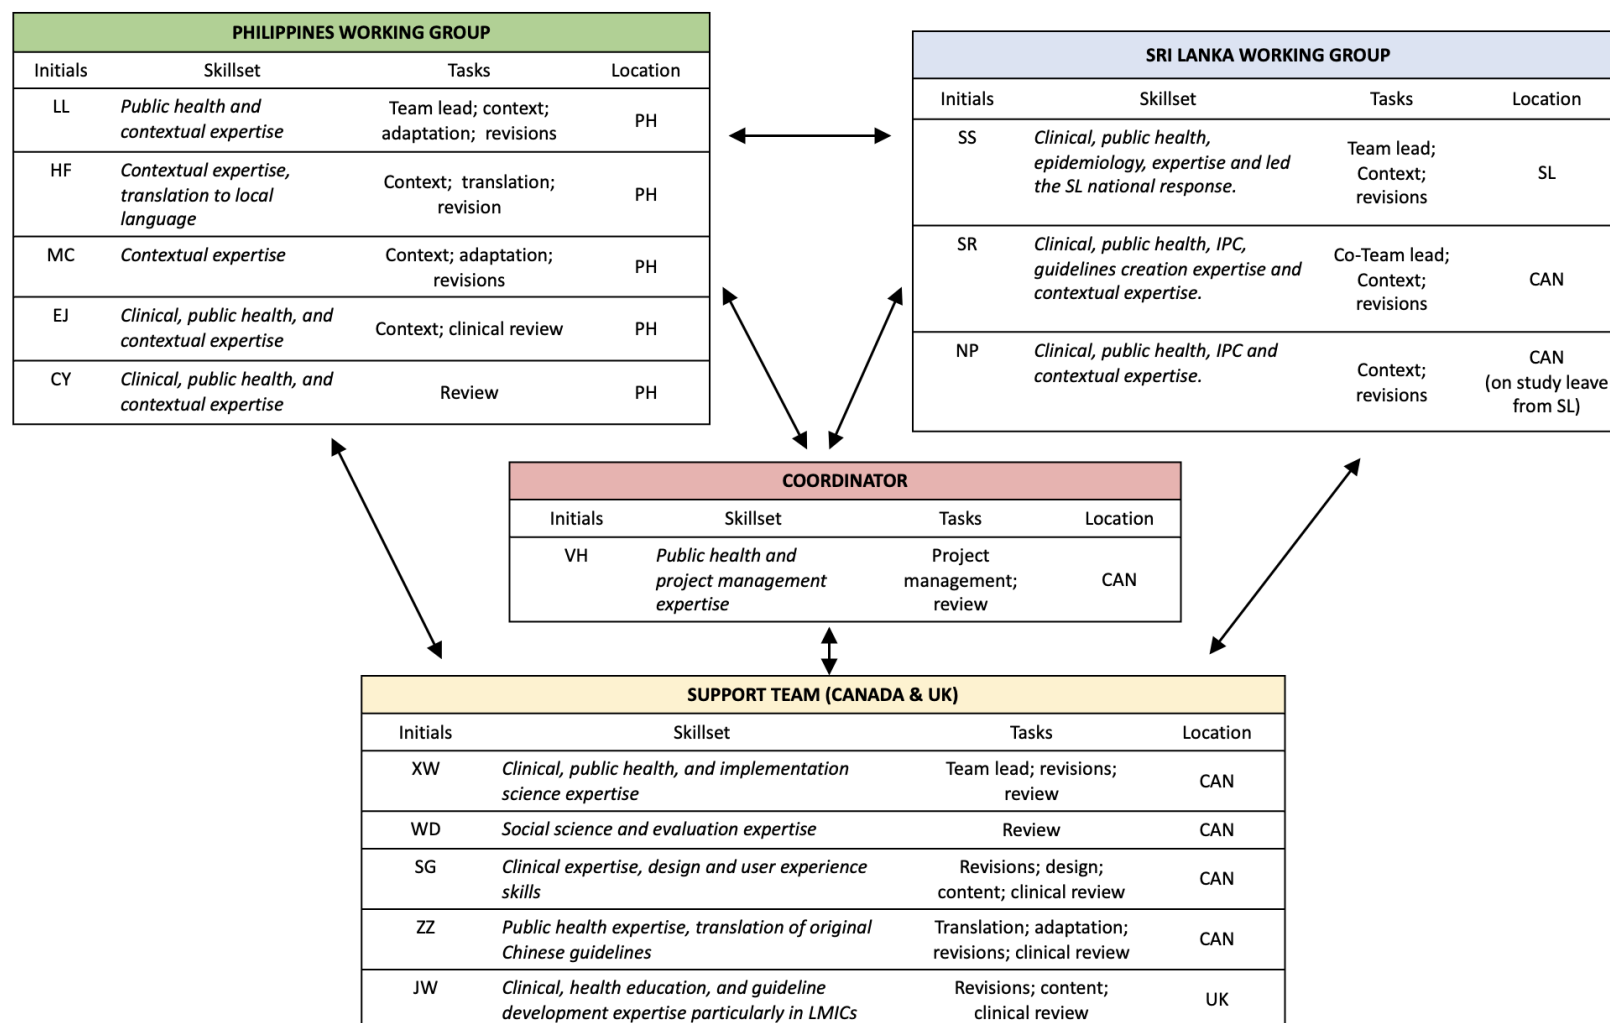

Supplement: bmjgh-2021-006406supp001.pdf [file bmjgh-2021-006406supp001.pdf]
